# Supplementary material for: Dissecting the control of shoot development in grapevine: genetics and genomics identify potential regulators
Source: BMC Plant Biol. 2020 Jan 29;20:43. doi: 10.1186/s12870-020-2258-0 (PMC6988314; doi:10.1186/s12870-020-2258-0)
Supplement: Supplementary file 10 — Additional file 10: Table S6. Sequence and mean PCR efficiency of primers used for qPCR analysis [file 12870_2020_2258_MOESM10_ESM.xls]

## Sheet: Table S6
Additional file 10: Table S6 Sequence and mean PCR efficiency of primers used for qPCR analysis.
Gene code	Gene function	Use of primer	Orientation of primer	Primer sequences ('5-'3)	Mean PCR efficiency
VIT_202s0025g01050	Ubiquitin conjugating enzyme E2-17	Reference gene	Forward	TCCTCCTGACAGTCCATATGCTGGT	1.822
			Reverse	GGGCTGGGCTCCACTGCTCC
VIT_206s0004g02820	SAND protein	Reference gene	Forward	TGCTGGGTTACCCCGGAGTTTGA	1.894
			Reverse	CAGACCCGGTTGCACGTCCG
VIT_207s0031g00285	Unknown fonction	Gene of interest	Forward	GTCAAGAGTGCGAGAGAGGG	1.659
			Reverse	TCTTTCGCATGCCTACACCC
VIT_207s0031g00320	Curly Leaf	Gene of interest	Forward	CCTTCTAGTGGCCGTGCTAA	1.85
			Reverse	CCACCTTTCCTCTAAGGCCAA
VIT_207s0031g00330	Phospholipase_C	Gene of interest	Forward	GGTTCAGGTTTTCTGTTGGGG	1.939
			Reverse	CCCATCCATGAGGCAAGGTC
VIT_207s0031g00340	F_box_prot	Gene of interest	Forward	CTATGGAGCTGCCGTCATGT	2.024
			Reverse	GGATGGCAAGCAAAGCGAAA
VIT_207s0031g00350	CCoAOMT1	Gene of interest	Forward	GATTATCTTGGAGGAGAAGACGGT	1.987
			Reverse	ATTAAACATGGCCAAGCCTTGAGA
VIT_207s0031g00355	Zinc finger protein	Gene of interest	Forward	AAGCCTACCATGATGAGCCC	1.995
			Reverse	GAAATTGCACCACCACCACC
VIT_214s0108g00760	Mini Zinc Finger 2A (MIF2A)	Gene of interest	Forward	AGGGAACCAGCAGTGAACTC	1.849
			Reverse	AAATCCTATCTCCCGTTTGAGGG
VIT_214s0108g00810	Mini Zinc Finger 2B (MIF2B)	Gene of interest	Forward	CCGAGTTAGTGTGCGAGTGT	1.945
			Reverse	ACCCAACAAAGGAAAAGCAGGAG
